# Supplementary material for: Agent-based simulations of China inbound tourism network
Source: PubMed Central journal article supplement (PMC6707315; doi:10.1038/s41598-019-48668-2), 2019-08-23
Supplement: 41598_2019_48668_MOESM1_ESM.pdf [file 41598_2019_48668_MOESM1_ESM.pdf]

# **Agent-based simulations of China inbound tourism network**

Jinfeng Wu,<sup>1</sup> Xingang Wang,<sup>2,\*</sup> and Bing Pan<sup>3</sup>

<sup>1</sup>*School of Geography and Tourism, Shaanxi Normal University, Xi'an 710062, China*

<sup>2</sup>*School of Physics and Information Technology,  
Shaanxi Normal University, Xi'an 710062, China*

<sup>3</sup>*Department of Recreation, Park, and Tourism Management,  
School of Health and Human Development,*

*Pennsylvania State University, University Park, Pennsylvania 16802, USA*

---

\* E-mail: wangxg@snnu.edu.cn

## I. SURVEY EXAMPLE

Figure S1 shows one of the questionnaires returned from the surveyed tourists. Key information in the questionnaire include: (1) the arrival and departure cities; (2) travel length; (3) days of stay; (4) travel planner; (5) travel purpose; (6) gender and nationality; (7) age; (8) income level; and (9) education level. The demographics of the final samples (856 in total) are given in Tab. S1.

## II. SATURATION POINT OF TOURISM ATTRACTIVENESS

To saturation point is defined as the critical tourism attractiveness,  $a_c$ , of a city over which the increasing speed of the overall visitation volume with respect to the tourism attractiveness,  $S'_{slope} = |\partial S/\partial a|$ , is smaller to a small threshold,  $S'_c$ . To find  $a_c$  for a specific city, we increase  $a$  from its current value to  $1 \times 10^3$ , and calculate the variation of the overall visitation volume,  $S$ . The results for some major non-port cities are plotted in Fig. S2. We see that with the increase of  $a$ , the value of  $S$  is first increased with a fast speed, then is gradually saturated. Setting  $S'_c = 0.1$ , the saturation attractiveness of Xi'an [Fig. S2(a)], Guilin [Fig. S2(b)], Hangzhou [Fig. S2(c)], Chengdu [Fig. S2(d)], Suzhou [Fig. S2(e)], Kunming [Fig. S2(f)], and Chongqing [Fig. S2(g)] are, respectively, 755, 845, 670, 910, 500, 950, and 900.

TABLE S1. Demographics of the final samples.

| Variable   | Categories             | Percent (%) |
|------------|------------------------|-------------|
| Gender     | Male                   | 39.53%      |
|            | Female                 | 60.47%      |
| Age        | $\leq 14$              | 2.07%       |
|            | 15 – 24                | 26.78%      |
|            | 25 – 44                | 46.44%      |
|            | 45 – 64                | 21.86%      |
|            | $\geq 65$              | 2.85%       |
| Education  | High school (or lower) | 23.56%      |
|            | College                | 41.37%      |
|            | Master degree          | 28.51%      |
|            | Doctoral degree        | 6.56%       |
| Income     | High                   | 17.39%      |
|            | Medium                 | 34.72%      |
|            | Low                    | 27.90%      |
| Profession | Students               | 31.86%      |
|            | Technician             | 31.72%      |
|            | Retired                | 4.16%       |
|            | Business               | 18.70%      |
|            | Engineer               | 5.68%       |
|            | Homemaker              | 2.08%       |
|            | Official               | 4.02%       |
|            | Others                 | 1.80%       |

Dear Madam/Sir: In order to improve the quality of travel service in China, we are conducting this survey funded by the National Natural Science Foundation of China. We sincerely appreciate your cooperation in completing the questionnaire.

Shaanxi Normal University

What's your entry city to and from China? Arrival: B Departure: A  
 A. Beijing B. Shanghai C. Guangzhou D. Hong Kong E. Macao F. Dalian G. Shenzhen  
 H. Hangzhou I. Guilin J. Chengdu K. Kunming L. Xi'an M. Xiamen N. Taipei O. Other \_\_\_\_\_

Please write down your travel plan:  
 1st stop D; 2nd stop B; 3rd stop Q; 4th stop L;  
 5th stop D; 6th stop A; 7th stop O; 8th stop \_\_\_\_\_.

A. Beijing B. Shanghai C. Guangzhou D. Xi'an E. Chengdu F. Wuhan G. Dalian H. Shenzhen I. Nanjing J.  
 Hangzhou K. Guilin L. Chongqing M. Kunming N. Xiamen O. Hong Kong P. Macao Q. Others

You arrived in this city by A; and you will leave for next city by A? A. airplane B. bus C. ships D. taxi E. car

What's your intended length of stay in China for this visit?  
 1-3 days  3-5 days  5-7 days  7-9 days  10-15 days  More than 15 days

Who is your travel route planner in China this time?  
 travel agent  myself  company  friends or relatives  others \_\_\_\_\_

Who is accompanying you this trip?  friends  family  colleagues  alone  others \_\_\_\_\_

What is the purpose of your visit to China? (choose one or more) \_\_\_\_\_  
 sightseeing  leisure  visit friends or relatives  on business  conference  religious  exchange culture,  
 sports or technology  others

How many times have you visited China?  only once  twice  3 times  4 times  more than 4 times

What's the factors that make you travel to China troublesome (choose one or more)  
 distance  transport convenience  security  information  communication  service and travel agent

How do you get tourism information about China? (choose one or more)  
 internet  newspaper  television  broadcast  friends  travel agent

Which city do you know before you travel to China? O, B, A  
 and which city impressed you mostly? D, B

A. Beijing B. Shanghai C. Guangzhou D. Xi'an E. Chengdu F. Wuhan G. Dalian H. Shenzhen I. Nanjing J.  
 Hangzhou K. Guilin L. Chongqing M. Kunming N. Xiamen O. Hong Kong P. Macao Q. Others

Your travel budget for this visit in China is:  = \$500  \$501-1000  \$1001-1500  \$1501-2000  = \$2000

Gender:  Male  Female Nationality: Australian; Hometown: Meitland, N.S.W.

Occupation:  Official  Professional  Clerk  Technician/worker  Businessman  Waiter/Salesman  Retired  
 Housewife  Military  Student  Tourism professionals Miner

Income level:  High level  Middle level  Low level

Education:  High school diploma or below  College diploma or bachelor's degree  Master's degree  Doctor's degree

Age:  less than 14  15-24  25-44  45-64  more than 65

How often did you travel abroad in recent 5 years?  1-3  4-6  7-9  More than 9 times

X'A

SEP

Ausely

FIG. S1. An example of the returned questionnaires.

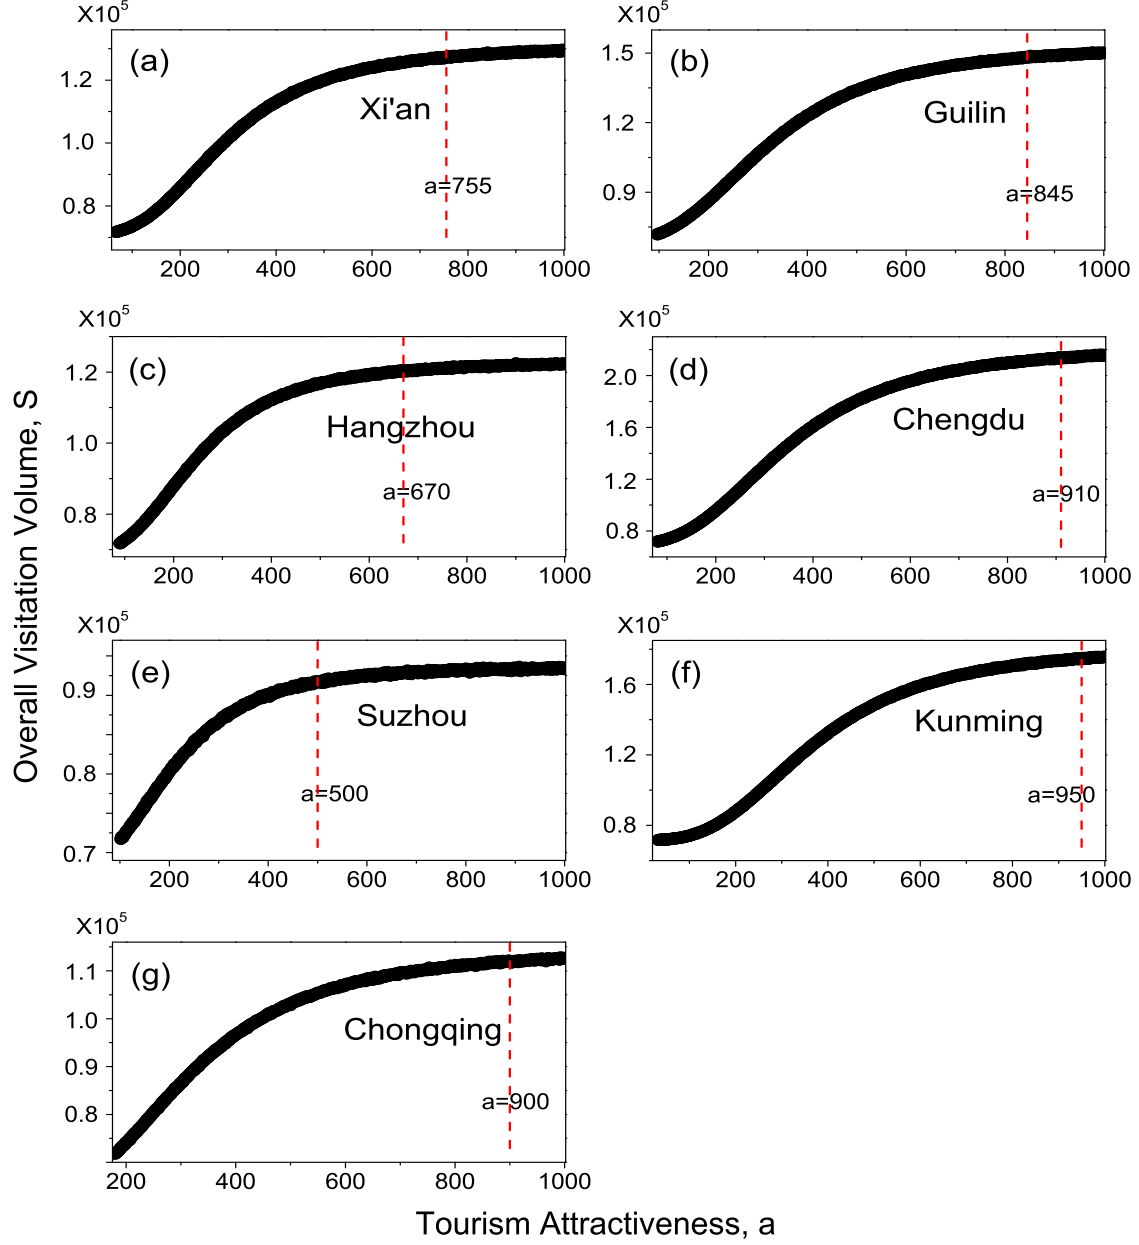

FIG. S2. **The saturation point of tourism attractiveness.** (a) Xi'an.  $a_0 = 66$ ,  $a_c \approx 755$ . (b) Guilin.  $a_0 = 96$ ,  $a_c \approx 845$ . (c) Hangzhou.  $a_0 = 90$ ,  $a_c \approx 670$ . (d) Chengdu.  $a_0 = 80$ ,  $a_c \approx 910$ . (e) Suzhou.  $a_0 = 102$ ,  $a_c \approx 500$ . (f) Kunming.  $a_0 = 32$ ,  $a_c \approx 950$ . (g) Chongqing.  $a_0 = 180$ ,  $a_c \approx 900$ . The critical increasing speed is chosen as  $S'_{slope} = 0.1$ .  $a_0$  denotes the current tourism attractiveness of the investigated city.
